# Supplementary material for: Anti-Infectious Plants of the Thai Karen: A Meta-Analysis
Source: PubMed Central journal article supplement (PMC7345792; doi:10.3390/antibiotics9060298), 2020-06-02
Supplement: antibiotics-09-00298-s001.pdf [file antibiotics-09-00298-s001.pdf]

## Supplementary Materials

### Anti-infectious plants of the Thai Karen: A meta-analysis

Methee Phumthum and Henrik Balslev

#### List of data sources

1. Anderson EF. Plants and people of the Golden Triangle ethnobotany of the hill tribes of northern Thailand. Southwest Portland: Timber Press, Inc.,; 1993.
2. Junkhonkaen J. Ethnobotany of Ban Bowee, Amphoe Suan Phueng, Changwat Ratchaburi. Master thesis. Bangkok: Kasetsart University Library; 2012.
3. Junsongduang A. Roles and importance of sacred Forest in biodiversity conservation in Mae Chaem District, Chiang Mai Province. PhD thesis. Chiang Mai: Chiang Mai University. 2014.
4. Kaewsangai S. Ethnobotany of Karen in Khun Tuen Noi Village, Mae Tuen Sub-district, Omkoi District, Chiang Mai Province. Master thesis. Chiang Mai: Chiang Mai University; 2017.
5. Kamwong K. Ethnobotany of Karens at Ban Mai Sawan and Ban Huay Pu Ling, Ban Luang Sub-District, Chom Thong District, Chiang Mai Province. Master thesis. Chiang Mai: Chiang Mai University; 2010.
6. Kantasrila, R. Ethnobotany fo Karen at Ban Wa Do Kro, Mae Song Sub-district, Tha Song Yang District, Tak Province. Master thesis. Chiang Mai: Chiang Mai University Library. 2016.
7. Klibai, A. Self-care with indigenous medicine of long-eared Karen ethnic group: Case study Ban Mae Sin, Ban Kang Pinjai, Ban Slok, Wang Chin district, Phrae province. Master thesis. Surin: Surin Rajabhat University. 2013.
8. Mahawongsanan, A., Change of herbal plants utilization of the Pgn K'nyau : A case study of Ban Huay Som Poy, Mae Tia Watershed, Chom Thong District, Chiang Mai Province. Master thesis. Chiang Mai: Chiang Mai University Library. 2008.
9. Prachuabaree L. Medicinal plants of Karang hill tribe in Baan Pong-lueg, Kaeng Krachan District, Phetchaburi Province. Master thesis, Pharmacy. Nakhonpathom: Silpakorn University; 2008.
10. Pongamornkul W. An ethnobotanical study of the Karen at Ban Yang Pu Toh and Ban Yang Thung Pong, Chiang Dao district, Chiang Mai province. Bachelor degree thesis. Chiang Mai: Chiang Mai University; 2003.
11. Puling W. Ethnobotany of Karen for studying medicinal plants at Angka Noi and Mae Klang villages, Chomthong district, Chiang Mai. Bachelor degree thesis. Chiang Mai: Chiang Mai University; 2001.
12. Sonsupub B. Ethnobotany of karen community in Raipa village, Huaykhayeng subdistrict, Thongphapume district, Kanchanaburi province. Master thesis. Bangkok: Kasetsart University; 2010.
13. Sukkho T. A survey of medicinal plants used by Karen people at Ban Chan and Chaem Luang Subdidtricts, Mae Chaem district, Chiang Mai province. Master thesis. Chiang Mai: Chiang Mai University; 2008.
14. Sutjaritjai N, Wangpakapattanawong P, Balslev H, Inta A. Traditional Uses of Leguminosae among the Karen in Thailand. *Plants*. 2019;8(12).
15. Trisonthi S, Trisonthi P. Ethnobotany of Karen in Mae Hae Nua village, Mae Na Jorn subdistrict, Mae Chaem district, Chiang Mai. Report. Bangkok: CU Library; 1995.
16. Winijchaiyanan P. Ethnobotany of Karen in Chiang Mai. Master thesis. Chiang Mai: Chiang Mai University Library; 1995.

## Anti-infectious plants of the Thai Karen: A meta-analysis

Methee Phumthum and Henrik Balslev

**Table S1** CI values of medicinal plant families for treatment different infection types used by Karen in Thailand

| Family           | Bacterial infection | Fungal infection | Helminth worm infection | Protozoal infection | Small animal infection | Unidentified infection | Viral Infection |
|------------------|---------------------|------------------|-------------------------|---------------------|------------------------|------------------------|-----------------|
| Acanthaceae      | 0.04                | -                | -                       | -                   | 0.04                   | -                      | 0.08            |
| Achariaceae      | -                   | -                | 0.04                    | -                   | -                      | -                      | -               |
| Acoraceae        | 0.04                | -                | -                       | -                   | -                      | -                      | -               |
| Adoxaceae        | -                   | -                | -                       | 0.04                | -                      | -                      | -               |
| Amaranthaceae    | -                   | -                | -                       | -                   | -                      | -                      | 0.04            |
| Anacardiaceae    | 0.04                | -                | -                       | -                   | -                      | -                      | -               |
| Annonaceae       | -                   | -                | -                       | -                   | 0.04                   | -                      | -               |
| Apiaceae         | -                   | -                | -                       | -                   | -                      | -                      | 0.04            |
| Apocynaceae      | -                   | 0.04             | 0.04                    | 0.32                | -                      | -                      | -               |
| Araceae          | 0.08                | -                | -                       | -                   | -                      | -                      | -               |
| Araliaceae       | -                   | -                | 0.04                    | -                   | -                      | -                      | -               |
| Aristolochiaceae | -                   | -                | 0.04                    | -                   | -                      | 0.04                   | 0.04            |
| Asparagaceae     | -                   | -                | 0.04                    | -                   | -                      | -                      | -               |
| Asteraceae       | -                   | 0.12             | 0.08                    | 0.12                | -                      | 0.08                   | 0.04            |
| Betulaceae       | -                   | -                | -                       | -                   | -                      | -                      | 0.04            |
| Bignoniaceae     | 0.04                | -                | -                       | 0.04                | -                      | -                      | 0.04            |
| Boraginaceae     | -                   | -                | -                       | -                   | -                      | -                      | 0.04            |
| Campanulaceae    | -                   | -                | -                       | -                   | -                      | -                      | 0.04            |
| Cannabaceae      | -                   | -                | -                       | -                   | -                      | -                      | 0.04            |
| Caryophyllaceae  | -                   | -                | -                       | -                   | -                      | 0.04                   | -               |
| Chloranthaceae   | -                   | -                | 0.04                    | -                   | -                      | -                      | -               |
| Combretaceae     | -                   | -                | 0.08                    | -                   | -                      | -                      | -               |
| Costaceae        | -                   | -                | -                       | -                   | -                      | 0.04                   | -               |
| Cucurbitaceae    | -                   | -                | -                       | 0.04                | 0.04                   | -                      | 0.04            |
| Dennstaedtiaceae | 0.04                | -                | -                       | -                   | -                      | -                      | -               |
| Ebenaceae        | -                   | -                | 0.04                    | -                   | -                      | -                      | -               |
| Euphorbiaceae    | 0.12                | -                | 0.12                    | 0.28                | -                      | -                      | 0.12            |
| Lamiaceae        | -                   | 0.08             | 0.04                    | 0.08                | 0.04                   | 0.04                   | 0.04            |
| Lauraceae        | 0.04                | 0.04             | -                       | 0.08                | 0.04                   | -                      | 0.20            |
| Leguminosae      | 0.44                | 0.16             | 0.16                    | 0.08                | 0.08                   | 0.20                   | 0.04            |
| Malvaceae        | -                   | -                | 0.08                    | 0.04                | -                      | -                      | -               |
| Marattiaceae     | 0.04                | -                | -                       | -                   | -                      | -                      | -               |
| Meliaceae        | -                   | -                | 0.04                    | -                   | -                      | -                      | -               |
| Menispermaceae   | 0.16                | -                | 0.16                    | 0.04                | -                      | 0.04                   | -               |
| Molluginaceae    | -                   | -                | -                       | -                   | -                      | -                      | 0.04            |
| Moraceae         | 0.08                | -                | 0.04                    | -                   | -                      | -                      | -               |
| Myrtaceae        | -                   | -                | -                       | 0.04                | -                      | 0.04                   | -               |
| Oxalidaceae      | 0.04                | -                | -                       | -                   | -                      | -                      | -               |

|                  |      |      |      |      |      |      |      |
|------------------|------|------|------|------|------|------|------|
| Papaveraceae     | -    | -    | -    | -    | -    | 0.04 | -    |
| Passifloraceae   | -    | -    | 0.04 | -    | -    | -    | -    |
| Phyllanthaceae   | -    | -    | 0.04 | -    | -    | -    | 0.08 |
| Piperaceae       | -    | -    | 0.04 | -    | -    | -    | -    |
| Plantaginaceae   | 0.04 | 0.04 | -    | 0.04 | -    | -    | -    |
| Plumbaginaceae   | -    | 0.04 | -    | -    | -    | -    | -    |
| Poaceae          | -    | 0.04 | 0.04 | 0.04 | -    | -    | -    |
| Polygonaceae     | -    | -    | -    | 0.04 | -    | -    | -    |
| Polypodiaceae    | -    | -    | -    | -    | 0.04 | -    | -    |
| Pontederiaceae   | 0.04 | -    | -    | -    | -    | -    | -    |
| Primulaceae      | -    | -    | 0.16 | -    | -    | -    | -    |
| Rubiaceae        | -    | 0.04 | -    | 0.08 | -    | -    | 0.04 |
| Rutaceae         | -    | 0.04 | -    | 0.08 | 0.04 | 0.04 | -    |
| Sapindaceae      | 0.12 | -    | -    | 0.04 | -    | -    | 0.04 |
| Scrophulariaceae | -    | -    | -    | -    | -    | 0.04 | -    |
| Simaroubaceae    | -    | -    | -    | 0.08 | -    | -    | -    |
| Smilacaceae      | -    | -    | -    | -    | -    | 0.04 | 0.04 |
| Solanaceae       | 0.04 | -    | -    | -    | -    | -    | -    |
| Styracaceae      | -    | -    | -    | 0.04 | -    | -    | -    |
| Vitaceae         | 0.04 | -    | -    | -    | -    | -    | -    |
| Xanthorrhoeaceae | -    | -    | -    | 0.04 | -    | -    | 0.04 |

**Table S2** Karen ethnomedicinal plants for treatments of infectious diseases and fever

| Species                                                 | Used for infections | Used for fever* | Used for both |
|---------------------------------------------------------|---------------------|-----------------|---------------|
| <i>Acacia caesia</i> (L.) Willd.                        | ✓                   |                 |               |
| <i>Acacia concinna</i> (Willd.) DC.                     | ✓                   |                 |               |
| <i>Acacia rugata</i> (Lam.) Fawc. & Rendle              |                     | ✓               |               |
| <i>Acalypha spiciflora</i> Burm.f.                      |                     |                 | ✓             |
| <i>Achyranthes aspera</i> L.                            | ✓                   |                 |               |
| <i>Acmella oleracea</i> (L.) R.K.Jansen                 | ✓                   |                 |               |
| <i>Acmella paniculata</i> (Wall. ex DC.) R.K.Jansen     | ✓                   |                 |               |
| <i>Acorus calamus</i> L.                                |                     |                 | ✓             |
| <i>Aesculus assamica</i> Griff.                         | ✓                   |                 |               |
| <i>Ageratina adenophora</i> (Spreng.) R.M.King & H.Rob. | ✓                   |                 |               |
| <i>Aglaia lawii</i> (Wight) C.J.Saldanha                |                     | ✓               |               |
| <i>Allium ascalonicum</i> L.                            |                     | ✓               |               |
| <i>Aloe vera</i> (L.) Burm.f.                           |                     |                 | ✓             |
| <i>Alstonia rostrata</i> C. E. C. Fisch.                |                     |                 | ✓             |
| <i>Alstonia scholaris</i> (L.) R. Br.                   |                     |                 | ✓             |
| <i>Amphineurion marginatum</i> (Roxb.) D.J.Middleton    | ✓                   |                 |               |
| <i>Andrographis paniculata</i> (Burm.f.) Nees           |                     | ✓               |               |
| <i>Angiopteris evecta</i> (G. Forst.) Hoffm.            | ✓                   |                 |               |
| <i>Annona squamosa</i> L.                               | ✓                   |                 |               |
| <i>Aquilaria crassna</i> Pierre ex Lecomte              |                     | ✓               |               |
| <i>Archidendron clypearia</i> (Jack) I.C.Nielsen        |                     | ✓               |               |
| <i>Archidendron jiringa</i> (Jack) I.C.Nielsen          | ✓                   |                 |               |
| <i>Arisaema auriculatum</i> Buchet                      | ✓                   |                 |               |
| <i>Aristolochia tagala</i> Cham.                        | ✓                   |                 |               |
| <i>Artemisia atrovirens</i> Hand.-Mazz.                 |                     |                 | ✓             |
| <i>Artocarpus heterophyllus</i> Lam.                    | ✓                   |                 |               |

|                                                                                    |   |   |   |
|------------------------------------------------------------------------------------|---|---|---|
| <i>Aspidistra elatior</i> Blume                                                    |   | ✓ |   |
| <i>Azadirachta indica</i> A.Juss.                                                  |   | ✓ |   |
| <i>Betula alnoides</i> Buch.-Ham. ex D.Don                                         | ✓ |   |   |
| <i>Blumea balsamifera</i> (L.) DC.                                                 |   |   | ✓ |
| <i>Brucea javanica</i> (L.) Merr.                                                  | ✓ |   |   |
| <i>Buddleja asiatica</i> Lour.                                                     | ✓ |   |   |
| <i>Caesalpinia sappan</i> L.                                                       |   |   | ✓ |
| <i>Cajanus cajan</i> (L.) Millsp.                                                  | ✓ |   |   |
| <i>Calophyllum polyanthum</i> Wall. ex Planch. & Triana                            |   | ✓ |   |
| <i>Camellia sinensis</i> (L.) Kuntze                                               |   | ✓ |   |
| <i>Cassytha filiformis</i> L.                                                      |   |   | ✓ |
| <i>Cayratia pedata</i> (Lam.) Gagnep.                                              |   | ✓ |   |
| <i>Celtis tetrandra</i> Roxb.                                                      |   |   | ✓ |
| <i>Celtis timorensis</i> Span.                                                     |   | ✓ |   |
| <i>Centella asiatica</i> (L.) Urb.                                                 |   |   | ✓ |
| <i>Cheilocostus speciosus</i> (J.Koenig) C.D.Specht                                | ✓ |   |   |
| <i>Chloranthus elatior</i> Link                                                    |   | ✓ |   |
| <i>Chromolaena odorata</i> (L.) R.M.King & H.Rob.                                  |   |   | ✓ |
| <i>Chrozophora tinctoria</i> (L.) A.Juss.                                          | ✓ |   |   |
| <i>Cinnamomum subavenium</i> Miq.                                                  |   | ✓ |   |
| <i>Cissampelos hispida</i> Forman                                                  |   |   | ✓ |
| <i>Cissus javana</i> DC.                                                           | ✓ |   |   |
| <i>Citrus aurantiifolia</i> (Christm.) Swingle                                     |   | ✓ |   |
| <i>Citrus hystrix</i> DC.                                                          |   | ✓ |   |
| <i>Citrus maxima</i> (Burm.) Merr.                                                 |   | ✓ |   |
| <i>Clausena excavata</i> Burm.f.                                                   |   |   | ✓ |
| <i>Clausena lenis</i> Drake                                                        |   | ✓ |   |
| <i>Cleidion javanicum</i> Blume                                                    |   |   | ✓ |
| <i>Clematis smilacifolia</i> Wall.                                                 |   | ✓ |   |
| <i>Clerodendrum infortunatum</i> L.                                                |   | ✓ |   |
| <i>Clerodendrum nutans</i> Wall. ex Jack                                           |   | ✓ |   |
| <i>Clerodendrum paniculatum</i> L.                                                 |   | ✓ |   |
| <i>Clinacanthus nutans</i> (Burm.f.) Lindau                                        |   | ✓ |   |
| <i>Codiaeum variegatum</i> (L.) Rumph. ex A.Juss.                                  | ✓ |   |   |
| <i>Combretum indicum</i> (L.) DeFilipps                                            | ✓ |   |   |
| <i>Croton sepalinus</i> Airy Shaw                                                  | ✓ |   |   |
| <i>Cyanthillium cinereum</i> (L.) H.Rob.                                           |   | ✓ |   |
| <i>Cyclea barbata</i> Miers                                                        | ✓ |   |   |
| <i>Cyclocodon lancifolius</i> subsp. <i>Celebicus</i> (Blume) K.E.Morris & Lammers | ✓ |   |   |
| <i>Dactylicapnos scandens</i> (D.Don) Hutch.                                       | ✓ |   |   |
| <i>Dalbergia cana</i> Kurz                                                         |   | ✓ |   |
| <i>Dendrocalamus hamiltonii</i> Nees & Arn. ex Munro                               | ✓ |   |   |
| <i>Dendrophthoe pentandra</i> (L.) Miq.                                            |   | ✓ |   |
| <i>Derris elliptica</i> (Wall.) Benth.                                             | ✓ |   |   |
| <i>Desmos dumosus</i> (Roxb.) Saff.                                                |   | ✓ |   |
| <i>Desmos macrocarpus</i> Bân                                                      |   | ✓ |   |
| <i>Dianella ensifolia</i> (L.) DC.                                                 | ✓ |   |   |
| <i>Diospyros mollis</i> Griff.                                                     | ✓ |   |   |
| <i>Dracaena terniflora</i> Roxb.                                                   |   | ✓ |   |
| <i>Drymaria cordata</i> (L.) Willd. ex Schult.                                     | ✓ |   |   |

|                                                      |   |   |   |
|------------------------------------------------------|---|---|---|
| <i>Dysoxylum grande</i> Hiern                        |   | ✓ |   |
| <i>Eichhornia crassipes</i> (Mart.) Solms            | ✓ |   |   |
| <i>Elephantopus scaber</i> L.                        |   |   | ✓ |
| <i>Eleusine indica</i> (L.) Gaertn.                  | ✓ |   |   |
| <i>Eleutherine bulbosa</i> (Mill.) Urb.              |   | ✓ |   |
| <i>Elytranthe albida</i> (Blume) Blume               |   | ✓ |   |
| <i>Embelia sessiliflora</i> Kurz                     | ✓ |   |   |
| <i>Entada rheedii</i> Spreng.                        | ✓ |   |   |
| <i>Erythrina subumbrans</i> (Hassk.) Merr.           | ✓ |   |   |
| <i>Eupatorium fortunei</i> Turcz.                    |   | ✓ |   |
| <i>Euphorbia heterophylla</i> L.                     | ✓ |   |   |
| <i>Eurycoma longifolia</i> Jack                      |   | ✓ |   |
| <i>Falconeria insignis</i> Royle                     |   | ✓ |   |
| <i>Ficus fistulosa</i> Reinw. ex Blume               | ✓ |   |   |
| <i>Flacourtia indica</i> (Burm.f.) Merr.             |   | ✓ |   |
| <i>Flemingia lineata</i> (L.) Aiton                  | ✓ |   |   |
| <i>Flueggea leucopyrus</i> Willd.                    | ✓ |   |   |
| <i>Garuga pinnata</i> Roxb.                          |   | ✓ |   |
| <i>Glinus herniarioides</i> (Gagnep.) Tardieu        | ✓ |   |   |
| <i>Glochidion sphaerogynum</i> (Müll.Arg.) Kurz      | ✓ |   |   |
| <i>Gmelina arborea</i> Roxb.                         | ✓ |   |   |
| <i>Grewia nervosa</i> (Lour.) Panigrahi              | ✓ |   |   |
| <i>Harrisonia perforata</i> (Blanco) Merr.           |   |   | ✓ |
| <i>Hedyotis ampliflora</i> Hance                     |   |   | ✓ |
| <i>Hedyotis pruinosa</i> Wight & Arn.                |   | ✓ |   |
| <i>Helicteres elongata</i> Wall. ex Bojer            | ✓ |   |   |
| <i>Heliotropium indicum</i> L.                       | ✓ |   |   |
| <i>Holarrhena pubescens</i> Wall. ex G.Don           |   | ✓ |   |
| <i>Houttuynia cordata</i> Thunb.                     |   | ✓ |   |
| <i>Hydnocarpus ilicifolia</i> King                   | ✓ |   |   |
| <i>Illigera trifoliata</i> (Griff.) Dunn             |   | ✓ |   |
| <i>Imperata cylindrica</i> (L.) Raeusch.             |   | ✓ |   |
| <i>Indigofera tinctoria</i> L.                       |   | ✓ |   |
| <i>Inula cappa</i> (Buch.-Ham. ex D.Don) DC.         |   | ✓ |   |
| <i>Ixora henryi</i> H.Lév.                           |   |   | ✓ |
| <i>Jasminum laurifolium</i> Roxb. ex Hornem.         |   | ✓ |   |
| <i>Justicia gendarussa</i> Burm.f.                   |   |   | ✓ |
| <i>Lepisanthes senegalensis</i> (Poir.) Leenh.       | ✓ |   |   |
| <i>Leucaena leucocephala</i> (Lam.) de Wit           | ✓ |   |   |
| <i>Litsea cubeba</i> (Lour.) Pers.                   | ✓ |   |   |
| <i>Litsea glutinosa</i> (Lour.) C.B.Rob.             | ✓ |   |   |
| <i>Litsea monopetala</i> (Roxb.) Pers.               |   | ✓ |   |
| <i>Luffa cylindrica</i> (L.) M.Roem.                 | ✓ |   |   |
| <i>Mallotus philippensis</i> (Lam.) Müll.Arg.        |   |   | ✓ |
| <i>Mangifera indica</i> L.                           | ✓ |   |   |
| <i>Mayodendron igneum</i> (Kurz) Kurz                |   | ✓ |   |
| <i>Melastoma sanguineum</i> Sims.                    |   | ✓ |   |
| <i>Melia azedarach</i> L.                            | ✓ |   |   |
| <i>Melicope glomerata</i> (W. G. Craib) T.G. Hartley |   |   | ✓ |
| <i>Memecylon pauciflorum</i> Blume                   |   | ✓ |   |
| <i>Microcos paniculata</i> L.                        | ✓ |   |   |

|                                                                             |   |   |   |
|-----------------------------------------------------------------------------|---|---|---|
| <i>Micromelum integerrimum</i> (Buch.-Ham. ex DC.) Wight & Arn. ex M. Roem. | ✓ |   |   |
| <i>Millingtonia hortensis</i> L.f.                                          |   |   | ✓ |
| <i>Mimosa diplotricha</i> Sauvalle                                          |   | ✓ |   |
| <i>Mimosa pigra</i> L.                                                      |   | ✓ |   |
| <i>Mimosa pudica</i> L.                                                     |   | ✓ |   |
| <i>Molineria capitulata</i> (Lour.) Herb.                                   |   | ✓ |   |
| <i>Momordica charantia</i> L.                                               | ✓ |   |   |
| <i>Morus macroura</i> Miq.                                                  | ✓ |   |   |
| <i>Mucuna macrocarpa</i> Wall.                                              | ✓ |   |   |
| <i>Mucuna pruriens</i> (L.) DC.                                             | ✓ |   |   |
| <i>Musa acuminata</i> Colla                                                 |   | ✓ |   |
| <i>Mussaenda sanderiana</i> Ridl.                                           | ✓ |   |   |
| <i>Nyctocalos brunfelsiiflora</i> Teijsm. & Binn.                           |   | ✓ |   |
| <i>Ocotea lancifolia</i> (Schott) Mez                                       | ✓ |   |   |
| <i>Oenanthe javanica</i> (Blume) DC.                                        |   | ✓ |   |
| <i>Oroxylum indicum</i> (L.) Kurz                                           | ✓ |   |   |
| <i>Osbeckia chinensis</i> L.                                                |   | ✓ |   |
| <i>Oxalis acetosella</i> L.                                                 | ✓ |   |   |
| <i>Passiflora foetida</i> L.                                                | ✓ |   |   |
| <i>Peliosanthes caesia</i> J.M.H.Shaw                                       |   | ✓ |   |
| <i>Peliosanthes macrophylla</i> Wall. ex Baker                              |   |   | ✓ |
| <i>Peperomia pellucida</i> (L.) Kunth                                       | ✓ |   |   |
| <i>Persicaria barbata</i> (L.) H.Hara                                       | ✓ |   |   |
| <i>Phlogacanthus curviflorus</i> (Wall.) Nees                               |   |   | ✓ |
| <i>Phyllanthus amarus</i> Schumach. & Thonn.                                |   | ✓ |   |
| <i>Phymatopteris cruciformis</i> (Ching) Pic. Serm.                         | ✓ |   |   |
| <i>Physalis minima</i> L.                                                   |   | ✓ |   |
| <i>Picrasma javanica</i> Blume                                              |   |   | ✓ |
| <i>Plantago major</i> L.                                                    |   | ✓ |   |
| <i>Platynerium wallichii</i> Hook.                                          |   | ✓ |   |
| <i>Plectranthus amboinicus</i> (Lour.) Spreng.                              |   | ✓ |   |
| <i>Plectranthus scutellarioides</i> (L.) R.Br.                              | ✓ |   |   |
| <i>Plumbago indica</i> L.                                                   |   |   | ✓ |
| <i>Plumeria obtusa</i> L.                                                   |   | ✓ |   |
| <i>Polygala arillata</i> Buch.-Ham. ex D. Don                               |   | ✓ |   |
| <i>Pothos chinensis</i> (Raf.) Merr.                                        |   |   | ✓ |
| <i>Pothos scandens</i> L.                                                   |   | ✓ |   |
| <i>Psidium guajava</i> L.                                                   |   |   | ✓ |
| <i>Pteridium aquilinum</i> Kuhn var. <i>wightianum</i> Tryon                | ✓ |   |   |
| <i>Pteridrys syrmatica</i> (Willd.) C. Chr. & Ching                         |   | ✓ |   |
| <i>Rauwolfia serpentina</i> (L.) Benth. ex Kurz                             | ✓ |   |   |
| <i>Rauwolfia verticillata</i> (Lour.) Baill.                                | ✓ |   |   |
| <i>Rhinacanthus nasutus</i> (L.) Kurz                                       | ✓ |   |   |
| <i>Rothea serrata</i> (L.) Steane & Mabb.                                   |   |   | ✓ |
| <i>Rubia cordifolia</i> L.                                                  | ✓ |   |   |
| <i>Saccharum officinarum</i> L.                                             | ✓ |   |   |
| <i>Sambucus javanica</i> Blume                                              |   |   | ✓ |
| <i>Sapindus rarak</i> DC.                                                   | ✓ |   |   |
| <i>Sarcandra glabra</i> (Thunb.) Nakai                                      |   |   | ✓ |
| <i>Scadoxus multiflorus</i> (Martyn) Raf.                                   |   | ✓ |   |

|                                                        |   |   |   |
|--------------------------------------------------------|---|---|---|
| <i>Schima wallichii</i> Choisy                         |   | ✓ |   |
| <i>Scoparia dulcis</i> L.                              |   |   | ✓ |
| <i>Scurrula ferruginea</i> (Jack) Danser               |   | ✓ |   |
| <i>Senna alata</i> (L.) Roxb.                          | ✓ |   |   |
| <i>Senna hirsuta</i> (L.) H.S.Irwin & Barneby          |   | ✓ |   |
| <i>Senna occidentalis</i> (L.) Link                    | ✓ |   |   |
| <i>Sida acuta</i> Burm.f.                              |   | ✓ |   |
| <i>Sida cordifolia</i> L.                              |   | ✓ |   |
| <i>Sida rhombifolia</i> L.                             |   | ✓ |   |
| <i>Smilax corbularia</i> Kunth                         | ✓ |   |   |
| <i>Smilax glabra</i> Roxb.                             |   | ✓ |   |
| <i>Smilax luzonensis</i> C.Presl                       |   | ✓ |   |
| <i>Solanum indicum</i> L.                              | ✓ |   |   |
| <i>Spondias pinnata</i> (L. f.) Kurz                   |   | ✓ |   |
| <i>Streblus asper</i> Lour.                            |   | ✓ |   |
| <i>Strobilanthes cusia</i> (Nees) Kuntze               |   |   | ✓ |
| <i>Styrax benzoides</i> W. G. Craib                    | ✓ |   |   |
| <i>Syzygium fruticosum</i> DC.                         | ✓ |   |   |
| <i>Tabernaemontana pandacaqui</i> Lam.                 | ✓ |   |   |
| <i>Tadehagi triquetrum</i> (L.) H.Ohashi               |   |   | ✓ |
| <i>Tamarindus indica</i> L.                            |   |   | ✓ |
| <i>Tectona grandis</i> L.f.                            | ✓ |   |   |
| <i>Thunbergia coccinea</i> Wall.                       |   | ✓ |   |
| <i>Thunbergia laurifolia</i> Lindl.                    |   | ✓ |   |
| <i>Thysanolaena latifolia</i> (Roxb. ex Hornem.) Honda |   | ✓ |   |
| <i>Tiliacora triandra</i> Diels                        |   | ✓ |   |
| <i>Tinospora baenzigeri</i> Forman                     |   | ✓ |   |
| <i>Tinospora crispa</i> (L.) Hook. f. & Thomson        |   |   | ✓ |
| <i>Tithonia diversifolia</i> (Hemsl.) A.Gray           | ✓ |   |   |
| <i>Trevesia palmata</i> (Roxb. ex Lindl.) Vis.         | ✓ |   |   |
| <i>Triadica cochinchinensis</i> Lour.                  |   |   | ✓ |
| <i>Trichosanthes tricuspidata</i> Lour.                | ✓ |   |   |
| <i>Turpinia pomifera</i> (Roxb.) DC.                   |   | ✓ |   |
| <i>Viscum articulatum</i> Burm. f.                     |   | ✓ |   |
| <i>Vitex trifolia</i> L.                               |   |   | ✓ |
| <i>Xylia xylocarpa</i> (Roxb.) Taub.                   | ✓ |   |   |

\*Data from Phumthum and Sadgrove (2020)
